# Supplementary material for: Exploring Orthogonality between Halogen and Hydrogen Bonding Involving Benzene
Source: MDPI journal article supplement (doi:10.3390/molecules26237126), 2021-11-25
Supplement: s1 [file s1]

# Exploring Orthogonality between Halogen and Hydrogen Bonding Involving Benzene

Alessandra Forni <sup>1,\*</sup>, Rosario Russo <sup>2</sup>, Giacomo Rapeti <sup>2</sup>, Stefano Pieraccini <sup>1,2,\*</sup> and Maurizio Sironi <sup>1,2,\*</sup>

<sup>1</sup> Istituto di Scienze e Tecnologie Chimiche “Giulio Natta” – CNR and INSTM RU, via Golgi 19, 20133 Milan, Italy

<sup>2</sup> Department of Chemistry, Università degli Studi di Milano and INSTM RU, via Golgi 19, 20133 Milano, Italy

\* Correspondence: alessandra.forni@scitec.cnr.it (A.F.); stefano.pieraccini@unimi.it (S.P.); maurizio.sironi@unimi.it (M.S.)

## Supplementary Material

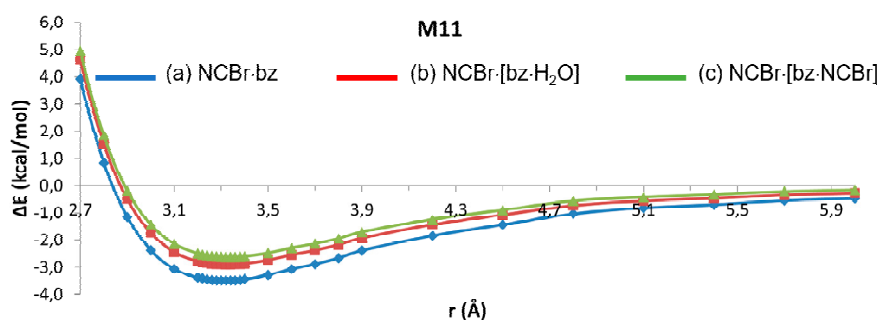

**Figure S1.** Binding energy curves,  $\Delta E$ , vs. Br distance from the center of benzene ring,  $r$ , computed for (a) NCBz·bz (blue line), (b) NCBz·[bz·H<sub>2</sub>O] (red line) and (c) NCBz·[bz·NCBz] (green line) systems in the T-shaped approach at the M11/aug-cc-PVTZ level of theory.

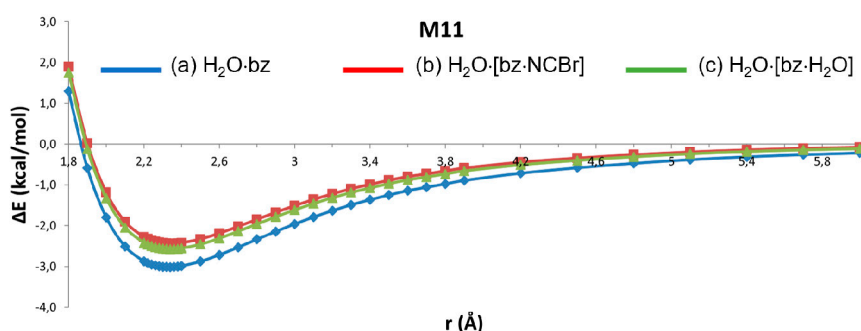

**Figure S2.** Binding energy curves,  $\Delta E$ , vs. (HO)H distance from the center of benzene ring,  $r$ , computed for (a) H<sub>2</sub>O·bz (blue line), (b) H<sub>2</sub>O·[bz·NCBz] (red line) and (c) H<sub>2</sub>O·[bz·H<sub>2</sub>O] (green line) systems in the T-shaped approach at the M11/aug-cc-PVTZ level of theory.

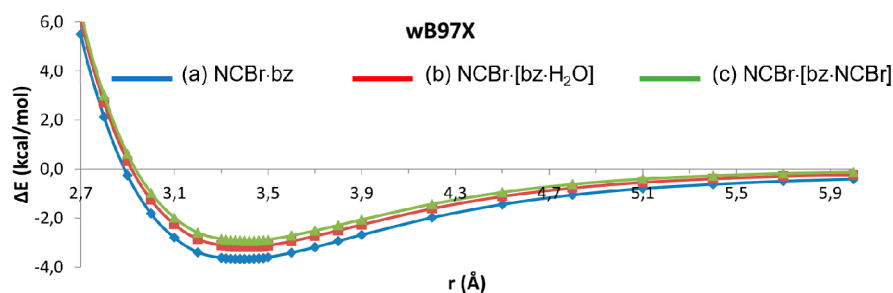

**Figure S3.** Binding energy curves,  $\Delta E$ , vs. Br distance from the center of benzene ring,  $r$ , computed for (a) NCBz-bz (blue line), (b) NCBz-bz-H<sub>2</sub>O (red line) and (c) NCBz-bz-NCBr (green line) systems in the T-shaped approach at the  $\omega$ B97X/aug-cc-PVTZ level of theory.

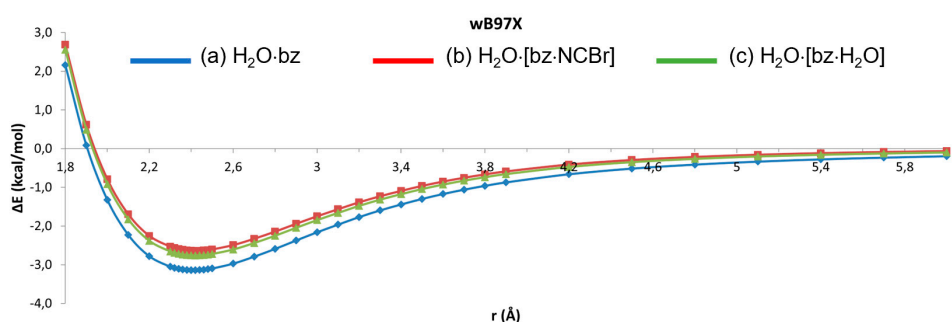

**Figure S4.** Binding energy curves,  $\Delta E$ , vs. (HO)H distance from the center of benzene ring,  $r$ , computed for (a) H<sub>2</sub>O-bz (blue line), (b) H<sub>2</sub>O-bz-NCBr (red line) and (c) H<sub>2</sub>O-bz-H<sub>2</sub>O (green line) systems in the T-shaped approach at the  $\omega$ B97X/aug-cc-PVTZ level of theory.

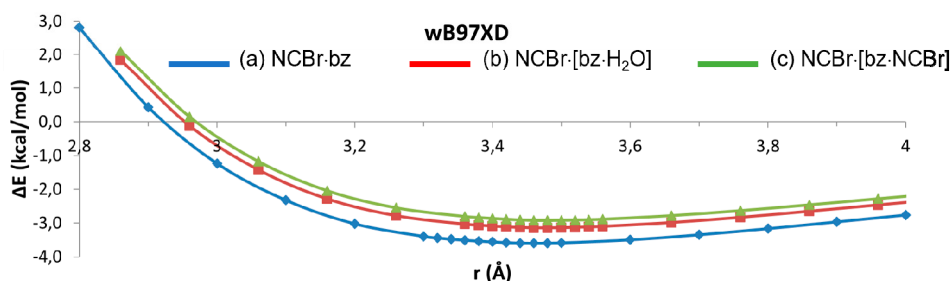

**Figure S5.** Binding energy curves,  $\Delta E$ , vs. Br distance from the center of benzene ring,  $r$ , computed for (a) NCBz-bz (blue line), (b) NCBz-bz-H<sub>2</sub>O (red line) and (c) NCBz-bz-NCBr (green line) systems in the T-shaped approach at the  $\omega$ B97XD/aug-cc-PVTZ level of theory.

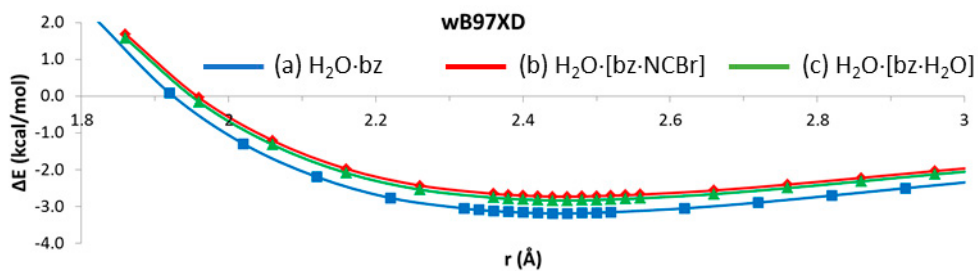

**Figure S6.** Binding energy curves,  $\Delta E$ , vs. (HO)H distance from the center of benzene ring,  $r$ , computed for (a) H<sub>2</sub>O-bz (blue line), (b) H<sub>2</sub>O-bz-NCBr (red line) and (c) H<sub>2</sub>O-bz-H<sub>2</sub>O (green line) systems in the T-shaped approach at the  $\omega$ B97XD/aug-cc-PVTZ level of theory.

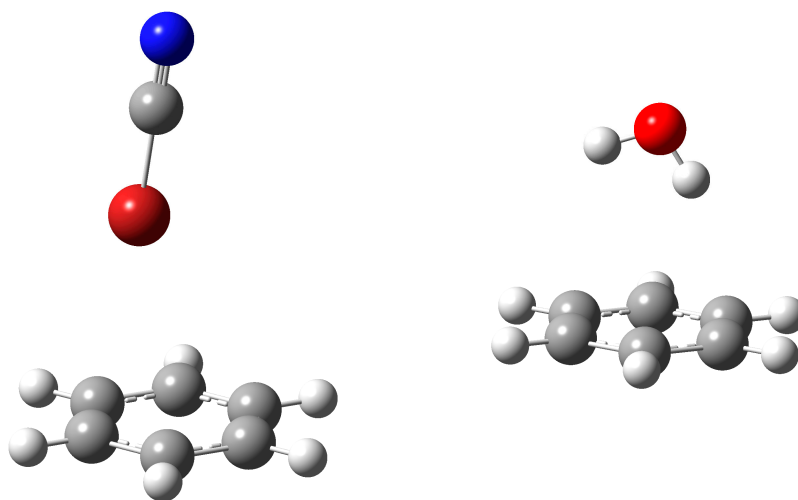

**Figure S7.**  $\omega$ B97XD/aug-cc-PVTZ fully optimized geometries of the NCBz·bz (left) and H<sub>2</sub>O·bz (right) dimers.

**Table S1.** Binding energy,  $\Delta E$ , vs. Br distance from the center of benzene ring,  $r$ , computed for (a) NCBz·bz, (b) NCBz·[bz·H<sub>2</sub>O] and (c) NCBz·[bz·NCBz] systems in the T-shaped approach at the M06-2X/aug-cc-PVTZ level of theory.

| $r$ (Å) | $\Delta E$ (kcal/mol) |                                |                    |
|---------|-----------------------|--------------------------------|--------------------|
|         | (a) NCBz·bz           | (b) NCBz·[bz·H <sub>2</sub> O] | (c) NCBz·[bz·NCBz] |
| 1.8     | 171.7322              | 172.5443                       | 173.0282           |
| 1.9     | 129.8621              | 130.6326                       | 131.1122           |
| 2       | 96.7615               | 97.5063                        | 97.9688            |
| 2.1     | 70.8899               | 71.6055                        | 72.0583            |
| 2.2     | 50.7751               | 51.4770                        | 51.9042            |
| 2.3     | 35.3370               | 36.0170                        | 36.4322            |
| 2.4     | 23.6149               | 24.2869                        | 24.6784            |
| 2.5     | 14.8787               | 15.5343                        | 15.9134            |
| 2.6     | 8.4525                | 9.1019                         | 9.4616             |
| 2.7     | 3.8912                | 4.5249                         | 4.8744             |
| 2.8     | 0.7301                | 1.3577                         | 1.6900             |
| 2.9     | -1.4017               | -0.7917                        | -0.4685            |
| 3       | -2.6810               | -2.0836                        | -1.7749            |
| 3.1     | -3.4185               | -2.8356                        | -2.5360            |
| 3.16    | -3.6841               | -3.1151                        | -2.8195            |
| 3.18    | -3.7436               | -3.1775                        | -2.8853            |
| 3.2     | -3.7881               | -3.2249                        | -2.9361            |
| 3.22    | -3.8169               | -3.2572                        | -2.9714            |
| 3.24    | -3.8294               | -3.2734                        | -2.9901            |
| 3.26    | -3.8280               | -3.2752                        | -2.9943            |
| 3.28    | -3.8176               | -3.2675                        | -2.9887            |
| 3.3     | -3.8019               | -3.2546                        | -2.9777            |
| 3.32    | -3.7831               | -3.2389                        | -2.9634            |
| 3.34    | -3.7617               | -3.2209                        | -2.9467            |

|     |         |         |         |
|-----|---------|---------|---------|
| 3.4 | -3.6868 | -3.1580 | -2.8864 |
| 3.5 | -3.4970 | -2.9892 | -2.7289 |
| 3.6 | -3.2055 | -2.7165 | -2.4665 |
| 3.7 | -2.9331 | -2.4626 | -2.2194 |
| 3.8 | -2.6811 | -2.2311 | -1.9959 |
| 3.9 | -2.4485 | -2.0163 | -1.7920 |
| 4.2 | -1.8928 | -1.5154 | -1.3115 |
| 4.5 | -1.4852 | -1.1519 | -0.9708 |
| 4.8 | -1.1878 | -0.8888 | -0.7261 |
| 5.1 | -0.9275 | -0.6670 | -0.5163 |
| 5.4 | -0.7230 | -0.4929 | -0.3537 |
| 5.7 | -0.5669 | -0.3598 | -0.2323 |
| 6   | -0.4580 | -0.2714 | -0.1537 |

**Table S2.** Binding energy,  $\Delta E$ , vs. (HO)H distance from the center of benzene ring,  $r$ , computed for (a)  $\text{H}_2\text{O}\cdot\text{bz}$ , (b)  $\text{H}_2\text{O}\cdot[\text{bz}\cdot\text{NCBr}]$  and (c)  $\text{H}_2\text{O}\cdot[\text{bz}\cdot\text{H}_2\text{O}]$  systems in the T-shaped approach at the M06-2X/aug-cc-PVTZ level of theory.

| $r$ (Å) | $\Delta E$ (kcal/mol)                  |                                                          |                                                                 |
|---------|----------------------------------------|----------------------------------------------------------|-----------------------------------------------------------------|
|         | (a) $\text{H}_2\text{O}\cdot\text{bz}$ | (b) $\text{H}_2\text{O}\cdot[\text{bz}\cdot\text{NCBr}]$ | (c) $\text{H}_2\text{O}\cdot[\text{bz}\cdot\text{H}_2\text{O}]$ |
| 1.8     | 1.0186                                 | 1.5986                                                   | 1.4464                                                          |
| 1.9     | -0.9010                                | -0.3169                                                  | -0.4681                                                         |
| 2       | -2.1457                                | -1.5615                                                  | -1.7110                                                         |
| 2.1     | -2.9025                                | -2.3240                                                  | -2.4702                                                         |
| 2.2     | -3.2926                                | -2.7217                                                  | -2.8643                                                         |
| 2.22    | -3.3359                                | -2.7671                                                  | -2.9089                                                         |
| 2.24    | -3.3706                                | -2.8040                                                  | -2.9449                                                         |
| 2.26    | -3.3974                                | -2.8330                                                  | -2.9730                                                         |
| 2.28    | -3.4167                                | -2.8546                                                  | -2.9938                                                         |
| 2.3     | -3.4289                                | -2.8694                                                  | -3.0076                                                         |
| 2.32    | -3.4345                                | -2.8775                                                  | -3.0148                                                         |
| 2.34    | -3.4337                                | -2.8792                                                  | -3.0157                                                         |
| 2.36    | -3.4266                                | -2.8746                                                  | -3.0102                                                         |
| 2.38    | -3.4134                                | -2.8640                                                  | -2.9987                                                         |
| 2.4     | -3.3947                                | -2.8480                                                  | -2.9819                                                         |
| 2.5     | -3.2475                                | -2.7166                                                  | -2.8460                                                         |
| 2.6     | -3.0479                                | -2.5337                                                  | -2.6587                                                         |
| 2.7     | -2.8163                                | -2.3195                                                  | -2.4403                                                         |
| 2.8     | -2.5871                                | -2.1090                                                  | -2.2255                                                         |
| 2.9     | -2.3671                                | -1.9060                                                  | -2.0190                                                         |
| 3       | -2.1612                                | -1.7196                                                  | -1.8277                                                         |
| 3.1     | -1.9874                                | -1.5642                                                  | -1.6682                                                         |
| 3.2     | -1.8187                                | -1.4121                                                  | -1.5126                                                         |
| 3.3     | -1.6692                                | -1.2814                                                  | -1.3770                                                         |
| 3.4     | -1.5410                                | -1.1689                                                  | -1.2609                                                         |

|     |         |         |         |
|-----|---------|---------|---------|
| 3.5 | -1.4183 | -1.0619 | -1.1503 |
| 3.6 | -1.3071 | -0.9653 | -1.0505 |
| 3.7 | -1.1974 | -0.8690 | -0.9509 |
| 3.8 | -1.1029 | -0.7897 | -0.8675 |
| 3.9 | -1.0211 | -0.7199 | -0.7951 |
| 4.2 | -0.7895 | -0.5242 | -0.5907 |
| 4.5 | -0.6094 | -0.3734 | -0.4333 |
| 4.8 | -0.4796 | -0.2662 | -0.3212 |
| 5.1 | -0.3819 | -0.1917 | -0.2412 |
| 5.4 | -0.3070 | -0.1357 | -0.1810 |
| 5.7 | -0.2510 | -0.0964 | -0.1378 |
| 6   | -0.2080 | -0.0678 | -0.1058 |

**Table S3.** Binding energy,  $\Delta E$ , vs. Br distance from the center of benzene ring,  $r$ , computed for (a) NCBz·bz, (b) NCBz·[bz·H<sub>2</sub>O] and (c) NCBz·[bz·NCBr] systems in the T-shaped approach at the M11/aug-cc-PVTZ level of theory.

| $r$ (Å) | $\Delta E$ (kcal/mol) |                                |                    |
|---------|-----------------------|--------------------------------|--------------------|
|         | (a) NCBz·bz           | (b) NCBz·[bz·H <sub>2</sub> O] | (c) NCBz·[bz·NCBr] |
| 1.8     | 178.1634              | 179.0501                       | 179.4914           |
| 1.9     | 134.7102              | 135.5517                       | 135.9873           |
| 2       | 100.1798              | 100.9890                       | 101.4122           |
| 2.1     | 73.0510               | 73.8365                        | 74.2441            |
| 2.2     | 52.0081               | 52.7750                        | 53.1664            |
| 2.3     | 35.9179               | 36.6701                        | 37.0451            |
| 2.4     | 23.8164               | 24.5556                        | 24.9154            |
| 2.5     | 14.8875               | 15.6132                        | 15.9604            |
| 2.6     | 8.4450                | 9.1548                         | 9.4926             |
| 2.7     | 3.9216                | 4.6144                         | 4.9443             |
| 2.8     | 0.8492                | 1.5245                         | 1.8469             |
| 2.9     | -1.1490               | -0.4924                        | -0.1774            |
| 3       | -2.3735               | -1.7355                        | -1.4283            |
| 3.1     | -3.0632               | -2.4445                        | -2.1450            |
| 3.2     | -3.3862               | -2.7855                        | -2.4973            |
| 3.22    | -3.4182               | -2.8211                        | -2.5351            |
| 3.24    | -3.4421               | -2.8485                        | -2.5646            |
| 3.26    | -3.4588               | -2.8689                        | -2.5868            |
| 3.28    | -3.4695               | -2.8832                        | -2.6028            |
| 3.3     | -3.4750               | -2.8922                        | -2.6136            |
| 3.32    | -3.4760               | -2.8968                        | -2.6198            |
| 3.34    | -3.4726               | -2.8970                        | -2.6218            |
| 3.36    | -3.4650               | -2.8930                        | -2.6197            |
| 3.38    | -3.4528               | -2.8846                        | -2.6134            |
| 3.4     | -3.4359               | -2.8715                        | -2.6025            |
| 3.5     | -3.2789               | -2.7352                        | -2.4779            |

|     |         |         |         |
|-----|---------|---------|---------|
| 3.6 | -3.0688 | -2.5438 | -2.2943 |
| 3.7 | -2.8875 | -2.3812 | -2.1372 |
| 3.8 | -2.6622 | -2.1790 | -1.9444 |
| 3.9 | -2.3904 | -1.9265 | -1.7010 |
| 4.2 | -1.8423 | -1.4317 | -1.2363 |
| 4.5 | -1.4366 | -1.0707 | -0.8937 |
| 4.8 | -1.0369 | -0.7292 | -0.5558 |
| 5.1 | -0.8176 | -0.5565 | -0.4096 |
| 5.4 | -0.6992 | -0.4540 | -0.3200 |
| 5.7 | -0.5445 | -0.3333 | -0.2056 |
| 6   | -0.4649 | -0.2736 | -0.1571 |

**Table S4.** Binding energy,  $\Delta E$ , vs. (HO)H distance from the center of benzene ring,  $r$ , computed for (a)  $\text{H}_2\text{O}\cdot\text{bz}$ , (b)  $\text{H}_2\text{O}\cdot[\text{bz}\cdot\text{NCBr}]$  and (c)  $\text{H}_2\text{O}\cdot[\text{bz}\cdot\text{H}_2\text{O}]$  systems in the T-shaped approach at the M11/aug-cc-PVTZ level of theory.

| $r$ (Å) | $\Delta E$ (kcal/mol)                  |                                                          |                                                                 |
|---------|----------------------------------------|----------------------------------------------------------|-----------------------------------------------------------------|
|         | (a) $\text{H}_2\text{O}\cdot\text{bz}$ | (b) $\text{H}_2\text{O}\cdot[\text{bz}\cdot\text{NCBr}]$ | (c) $\text{H}_2\text{O}\cdot[\text{bz}\cdot\text{H}_2\text{O}]$ |
| 1.8     | 1.2958                                 | 1.8958                                                   | 1.7560                                                          |
| 1.9     | -0.5876                                | 0.0210                                                   | -0.1209                                                         |
| 2       | -1.7946                                | -1.1847                                                  | -1.3272                                                         |
| 2.1     | -2.5082                                | -1.9031                                                  | -2.0448                                                         |
| 2.2     | -2.8745                                | -2.2788                                                  | -2.4183                                                         |
| 2.22    | -2.9166                                | -2.3232                                                  | -2.4622                                                         |
| 2.24    | -2.9501                                | -2.3593                                                  | -2.4976                                                         |
| 2.26    | -2.9758                                | -2.3877                                                  | -2.5253                                                         |
| 2.28    | -2.9944                                | -2.4090                                                  | -2.5460                                                         |
| 2.3     | -3.0064                                | -2.4240                                                  | -2.5602                                                         |
| 2.32    | -3.0124                                | -2.4330                                                  | -2.5685                                                         |
| 2.34    | -3.0129                                | -2.4368                                                  | -2.5714                                                         |
| 2.36    | -3.0086                                | -2.4357                                                  | -2.5696                                                         |
| 2.38    | -2.9998                                | -2.4303                                                  | -2.5633                                                         |
| 2.4     | -2.9870                                | -2.4210                                                  | -2.5531                                                         |
| 2.5     | -2.8763                                | -2.3284                                                  | -2.4562                                                         |
| 2.6     | -2.7152                                | -2.1867                                                  | -2.3100                                                         |
| 2.7     | -2.5293                                | -2.0206                                                  | -2.1393                                                         |
| 2.8     | -2.3342                                | -1.8454                                                  | -1.9595                                                         |
| 2.9     | -2.1432                                | -1.6742                                                  | -1.7836                                                         |
| 3       | -1.9598                                | -1.5100                                                  | -1.6148                                                         |
| 3.1     | -1.7880                                | -1.3578                                                  | -1.4580                                                         |
| 3.2     | -1.6320                                | -1.2196                                                  | -1.3158                                                         |
| 3.3     | -1.4888                                | -1.0946                                                  | -1.1865                                                         |
| 3.4     | -1.3637                                | -0.9877                                                  | -1.0754                                                         |
| 3.5     | -1.2478                                | -0.8859                                                  | -0.9711                                                         |
| 3.6     | -1.1411                                | -0.7958                                                  | -0.8770                                                         |

|     |         |         |         |
|-----|---------|---------|---------|
| 3.7 | -1.0572 | -0.7291 | -0.8062 |
| 3.8 | -0.9750 | -0.6575 | -0.7334 |
| 3.9 | -0.8903 | -0.5859 | -0.6589 |
| 4.2 | -0.7128 | -0.4426 | -0.5086 |
| 4.5 | -0.5801 | -0.3409 | -0.3996 |
| 4.8 | -0.4702 | -0.2600 | -0.3119 |
| 5.1 | -0.3796 | -0.1913 | -0.2383 |
| 5.4 | -0.3112 | -0.1401 | -0.1835 |
| 5.7 | -0.2581 | -0.1037 | -0.1433 |
| 6   | -0.2167 | -0.0765 | -0.1128 |

**Table S5.** Binding energy,  $\Delta E$ , vs. Br distance from the center of benzene ring,  $r$ , computed for (a) NCB $\cdot$ bz, (b) NCB $\cdot$ [bz $\cdot$ H $_2$ O] and (c) NCB $\cdot$ [bz $\cdot$ NCBr] systems in the T-shaped approach at the  $\omega$ B97X/aug-cc-PVTZ level of theory.

| $r$ (Å) | $\Delta E$ (kcal/mol) |                                       |                                   |
|---------|-----------------------|---------------------------------------|-----------------------------------|
|         | (a) NCB $\cdot$ bz    | (b) NCB $\cdot$ [bz $\cdot$ H $_2$ O] | (c) NCB $\cdot$ [bz $\cdot$ NCBr] |
| 1.8     | 175.3732              | 176.1069                              | 176.5309                          |
| 1.9     | 133.0952              | 133.7828                              | 134.2224                          |
| 2.0     | 99.5822               | 100.2626                              | 100.6763                          |
| 2.1     | 73.4014               | 74.0654                               | 74.4714                           |
| 2.2     | 53.1105               | 53.7611                               | 54.1529                           |
| 2.3     | 37.5376               | 38.1807                               | 38.5546                           |
| 2.4     | 25.7282               | 26.3573                               | 26.7185                           |
| 2.5     | 16.8673               | 17.4921                               | 17.8354                           |
| 2.6     | 10.2907               | 10.9065                               | 11.2322                           |
| 2.7     | 5.5230                | 6.1250                                | 6.4418                            |
| 2.8     | 2.1188                | 2.7104                                | 3.0154                            |
| 2.9     | -0.2519               | 0.3234                                | 0.6182                            |
| 3       | -1.8109               | -1.2474                               | -0.9638                           |
| 3.1     | -2.7924               | -2.2453                               | -1.9682                           |
| 3.2     | -3.3884               | -2.8577                               | -2.5900                           |
| 3.3     | -3.6221               | -3.1052                               | -2.8494                           |
| 3.32    | -3.6395               | -3.1265                               | -2.8713                           |
| 3.34    | -3.6518               | -3.1423                               | -2.8872                           |
| 3.36    | -3.6614               | -3.1551                               | -2.9007                           |
| 3.38    | -3.6675               | -3.1643                               | -2.9114                           |
| 3.4     | -3.6701               | -3.1696                               | -2.9188                           |
| 3.42    | -3.6681               | -3.1720                               | -2.9221                           |
| 3.44    | -3.6603               | -3.1689                               | -2.9196                           |
| 3.46    | -3.6477               | -3.1587                               | -2.9125                           |
| 3.48    | -3.6266               | -3.1414                               | -2.8981                           |
| 3.5     | -3.5993               | -3.1174                               | -2.8758                           |
| 3.6     | -3.4077               | -2.9421                               | -2.7098                           |
| 3.7     | -3.1807               | -2.7312                               | -2.5059                           |
| 3.8     | -2.9344               | -2.5030                               | -2.2855                           |
| 3.9     | -2.6796               | -2.2642                               | -2.0561                           |
| 4.2     | -1.9774               | -1.6113                               | -1.4233                           |

|     |         |         |         |
|-----|---------|---------|---------|
| 4.5 | -1.4363 | -1.1118 | -0.9434 |
| 4.8 | -1.0542 | -0.7699 | -0.6156 |
| 5.1 | -0.7901 | -0.5406 | -0.3993 |
| 5.4 | -0.6198 | -0.3978 | -0.2682 |
| 5.7 | -0.4925 | -0.2955 | -0.1751 |
| 6   | -0.4110 | -0.2338 | -0.1226 |

**Table S6.** Binding energy,  $\Delta E$ , vs. (HO)H distance from the center of benzene ring,  $r$ , computed for (a)  $\text{H}_2\text{O}\cdot\text{bz}$ , (b)  $\text{H}_2\text{O}\cdot[\text{bz}\cdot\text{NCBr}]$  and (c)  $\text{H}_2\text{O}\cdot[\text{bz}\cdot\text{H}_2\text{O}]$  systems in the T-shaped approach at the  $\omega\text{B97X}/\text{aug-cc-PVTZ}$  level of theory.

| $r$ (Å) | $\Delta E$ (kcal/mol)                  |                                                          |                                                                 |
|---------|----------------------------------------|----------------------------------------------------------|-----------------------------------------------------------------|
|         | (a) $\text{H}_2\text{O}\cdot\text{bz}$ | (b) $\text{H}_2\text{O}\cdot[\text{bz}\cdot\text{NCBr}]$ | (c) $\text{H}_2\text{O}\cdot[\text{bz}\cdot\text{H}_2\text{O}]$ |
| 1.8     | 2.1563                                 | 2.6831                                                   | 2.5516                                                          |
| 1.9     | 0.0884                                 | 0.6210                                                   | 0.4892                                                          |
| 2       | -1.3217                                | -0.7879                                                  | -0.9188                                                         |
| 2.1     | -2.2273                                | -1.6972                                                  | -1.8262                                                         |
| 2.2     | -2.7773                                | -2.2541                                                  | -2.3804                                                         |
| 2.3     | -3.0479                                | -2.5336                                                  | -2.6569                                                         |
| 2.32    | -3.0790                                | -2.5673                                                  | -2.6898                                                         |
| 2.34    | -3.1039                                | -2.5947                                                  | -2.7163                                                         |
| 2.36    | -3.1214                                | -2.6140                                                  | -2.7351                                                         |
| 2.38    | -3.1320                                | -2.6269                                                  | -2.7473                                                         |
| 2.4     | -3.1376                                | -2.6354                                                  | -2.7549                                                         |
| 2.42    | -3.1388                                | -2.6395                                                  | -2.7582                                                         |
| 2.44    | -3.1351                                | -2.6381                                                  | -2.7562                                                         |
| 2.46    | -3.1261                                | -2.6315                                                  | -2.7489                                                         |
| 2.48    | -3.1124                                | -2.6204                                                  | -2.7372                                                         |
| 2.5     | -3.0949                                | -2.6055                                                  | -2.7216                                                         |
| 2.6     | -2.9678                                | -2.4930                                                  | -2.6054                                                         |
| 2.7     | -2.7884                                | -2.3294                                                  | -2.4381                                                         |
| 2.8     | -2.5871                                | -2.1437                                                  | -2.2488                                                         |
| 2.9     | -2.3702                                | -1.9425                                                  | -2.0443                                                         |
| 3       | -2.1581                                | -1.7479                                                  | -1.8455                                                         |
| 3.1     | -1.9605                                | -1.5657                                                  | -1.6600                                                         |
| 3.2     | -1.7670                                | -1.3877                                                  | -1.4786                                                         |
| 3.3     | -1.5938                                | -1.2314                                                  | -1.3179                                                         |
| 3.4     | -1.4408                                | -1.0930                                                  | -1.1761                                                         |
| 3.5     | -1.2976                                | -0.9641                                                  | -1.0441                                                         |
| 3.6     | -1.1708                                | -0.8518                                                  | -0.9283                                                         |
| 3.7     | -1.0588                                | -0.7533                                                  | -0.8266                                                         |
| 3.8     | -0.9595                                | -0.6664                                                  | -0.7370                                                         |
| 3.9     | -0.8708                                | -0.5901                                                  | -0.6578                                                         |
| 4.2     | -0.6606                                | -0.4126                                                  | -0.4731                                                         |
| 4.5     | -0.5147                                | -0.2943                                                  | -0.3489                                                         |
| 4.8     | -0.4111                                | -0.2145                                                  | -0.2639                                                         |



|     |         |         |         |
|-----|---------|---------|---------|
| 5.1 | -0.3345 | -0.1583 | -0.2033 |
| 5.4 | -0.2766 | -0.1177 | -0.1589 |
| 5.7 | -0.2317 | -0.0880 | -0.1256 |
| 6   | -0.1952 | -0.0648 | -0.0994 |

**Table S7.** Binding energy,  $\Delta E$ , vs. Br distance from the center of benzene ring,  $r$ , computed for (a) NCBz·bz, (b) NCBz·[bz·H<sub>2</sub>O] and (c) NCBz·[bz·NCBz] systems in the T-shaped approach at the  $\omega$ B97XD/aug-cc-PVTZ level of theory.

| $r$ (Å)     | $\Delta E$ (kcal/mol) | $r$ (Å)                        | $\Delta E$ (kcal/mol) |                    |
|-------------|-----------------------|--------------------------------|-----------------------|--------------------|
| (a) NCBz·bz |                       | (b) NCBz·[bz·H <sub>2</sub> O] |                       | (c) NCBz·[bz·NCBz] |
| 2.80        | 2.8148                | 2.86                           | 1.8384                | 2.1076             |
| 2.90        | 0.4349                | 2.96                           | -0.1196               | 0.1463             |
| 3.00        | -1.2346               | 3.06                           | -1.4250               | -1.1731            |
| 3.10        | -2.3213               | 3.16                           | -2.2844               | -2.0394            |
| 3.20        | -3.0199               | 3.26                           | -2.7824               | -2.5454            |
| 3.30        | -3.3925               | 3.36                           | -3.0331               | -2.8025            |
| 3.32        | -3.4386               | 3.38                           | -3.0628               | -2.8329            |
| 3.34        | -3.4759               | 3.4                            | -3.0881               | -2.8596            |
| 3.36        | -3.5066               | 3.42                           | -3.1119               | -2.8837            |
| 3.38        | -3.5327               | 3.44                           | -3.1301               | -2.9048            |
| 3.40        | -3.5551               | 3.46                           | -3.1398               | -2.9179            |
| 3.42        | -3.5752               | 3.48                           | -3.1412               | -2.9194            |
| 3.44        | -3.5912               | 3.5                            | -3.1354               | -2.9154            |
| 3.46        | -3.5973               | 3.52                           | -3.1267               | -2.9085            |
| 3.48        | -3.5926               | 3.54                           | -3.1122               | -2.8963            |
| 3.50        | -3.5843               | 3.56                           | -3.0985               | -2.8835            |
| 3.60        | -3.4932               | 3.66                           | -2.9844               | -2.7757            |
| 3.70        | -3.3441               | 3.76                           | -2.8310               | -2.6298            |
| 3.80        | -3.1623               | 3.86                           | -2.6511               | -2.4579            |
| 3.90        | -2.9626               | 3.96                           | -2.4642               | -2.2764            |
| 4.00        | -2.7599               | 4.06                           | -2.2766               | -2.0955            |

**Table S8.** Binding energy,  $\Delta E$ , vs. (HO)H distance from the center of benzene ring,  $r$ , computed for (a) H<sub>2</sub>O·bz, (b) H<sub>2</sub>O·[bz·NCBz] and (c) H<sub>2</sub>O·[bz·H<sub>2</sub>O] systems in the T-shaped approach at the  $\omega$ B97XD/aug-cc-PVTZ level of theory.

| $r$ (Å)                 | $\Delta E$ (kcal/mol) | $r$ (Å)                        | $\Delta E$ (kcal/mol) |                                            |
|-------------------------|-----------------------|--------------------------------|-----------------------|--------------------------------------------|
| (a) H <sub>2</sub> O·bz |                       | (b) H <sub>2</sub> O·[bz·NCBz] |                       | (c) H <sub>2</sub> O·[bz·H <sub>2</sub> O] |
| 1.82                    | 2.0859                | 1.86                           | 1.6834                | 1.5698                                     |
| 1.92                    | 0.0788                | 1.96                           | -0.0457               | -0.1601                                    |
| 2.02                    | -1.2951               | 2.06                           | -1.2095               | -1.3235                                    |
| 2.12                    | -2.1980               | 2.16                           | -1.9777               | -2.0898                                    |
| 2.22                    | -2.7704               | 2.26                           | -2.4324               | -2.5426                                    |
| 2.32                    | -3.0555               | 2.36                           | -2.6575               | -2.7645                                    |
| 2.34                    | -3.0943               | 2.38                           | -2.6830               | -2.7894                                    |
| 2.36                    | -3.1254               | 2.40                           | -2.7048               | -2.8104                                    |
| 2.38                    | -3.1490               | 2.42                           | -2.7218               | -2.8267                                    |

|      |         |      |         |         |
|------|---------|------|---------|---------|
| 2.4  | -3.1677 | 2.44 | -2.7315 | -2.8361 |
| 2.42 | -3.1822 | 2.46 | -2.7337 | -2.8379 |
| 2.44 | -3.1902 | 2.48 | -2.7295 | -2.8332 |
| 2.46 | -3.1907 | 2.50 | -2.7201 | -2.8234 |
| 2.48 | -3.1846 | 2.52 | -2.7073 | -2.8100 |
| 2.5  | -3.1730 | 2.54 | -2.6929 | -2.7948 |
| 2.52 | -3.1572 | 2.56 | -2.6774 | -2.7784 |
| 2.62 | -3.0516 | 2.66 | -2.5658 | -2.6639 |
| 2.72 | -2.8943 | 2.76 | -2.4044 | -2.4998 |
| 2.82 | -2.7019 | 2.86 | -2.2225 | -2.3150 |
| 2.92 | -2.5033 | 2.96 | -2.0372 | -2.1266 |
| 3.02 | -2.3087 | 3.06 | -1.8634 | -1.9496 |

**Table S9.** Equilibrium distances  $r_{eq}$  (Å) and interaction energies  $\Delta E_{XB}$  and  $\Delta E_{HB}$  (kcal/mol) for NCBz·bz and H<sub>2</sub>O·bz dimers in the 45° ‘C approach’ (Figure S13) and ‘bond approach’ (Figure S14).

| NCBr·bz         |          |                 |
|-----------------|----------|-----------------|
|                 | $r_{eq}$ | $\Delta E_{XB}$ |
| ‘C approach’    | 4.12     | -2.00           |
| ‘bond approach’ | 4.02     | -2.34           |

  

| H(1)OH(2)·bz <sup>a</sup>               |          |                 |
|-----------------------------------------|----------|-----------------|
|                                         | $r_{eq}$ | $\Delta E_{HB}$ |
| ‘C approach’, H(1) up <sup>b</sup>      | 3.12     | -2.29           |
| ‘C approach’, H(1) down <sup>c</sup>    | 3.24     | -1.50           |
| ‘bond approach’, H(1) up <sup>b</sup>   | 3.06     | -2.51           |
| ‘bond approach’, H(1) down <sup>c</sup> | 3.16     | -1.77           |

<sup>a</sup> H(1) and H(2) indicate the non-interacting and the interacting H atoms, respectively; <sup>b</sup>H(1) up indicates the H(1) points far from the benzene ring; <sup>c</sup>H(1) down indicates the H(1) points towards the benzene ring.

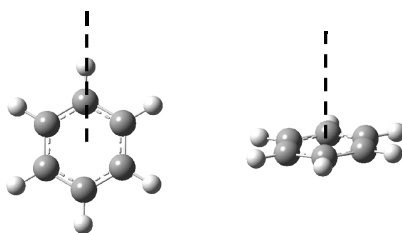

**Figure S8.** Top (left) and side (right) views of the 45° approach of NCBz or H<sub>2</sub>O towards the center of benzene ring along the line whose projection on the benzene plane crosses one carbon atom (‘C approach’).

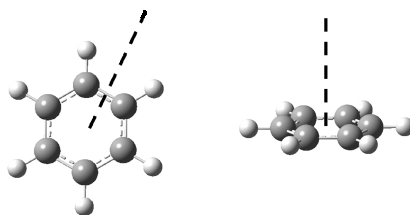

**Figure S9.** Top (left) and side (right) views of the 45° approach of NCBz or H<sub>2</sub>O towards the center of benzene ring along the line whose projection on the benzene plane crosses the center of a CC bond (‘bond approach’).

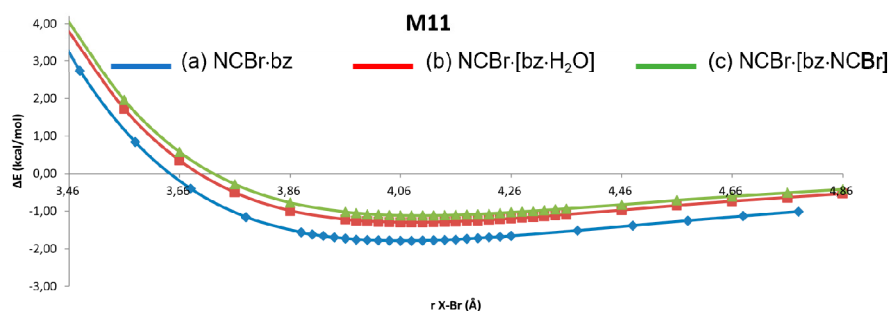

**Figure S10.** Binding energy curves,  $\Delta E$ , vs. Br distance from the center of benzene ring,  $r$ , computed for (a) NCBz-bz (blue line), (b) NCBz-[bz-H<sub>2</sub>O] (red line) and (c) NCBz-[bz-NCBr] (green line) systems in the perpendicular approach at the M11/aug-cc-PVTZ level of theory.

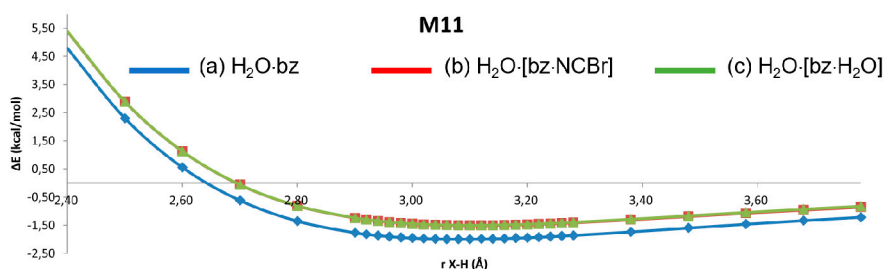

**Figure S11.** Binding energy curves,  $\Delta E$ , vs. (HO)H distance from the center of benzene ring,  $r$ , computed for (a) H<sub>2</sub>O-bz (blue line), (b) H<sub>2</sub>O-[bz-NCBr] (red line) and (c) H<sub>2</sub>O-[bz-H<sub>2</sub>O] (green line) systems in the perpendicular approach at the M11/aug-cc-PVTZ level of theory.

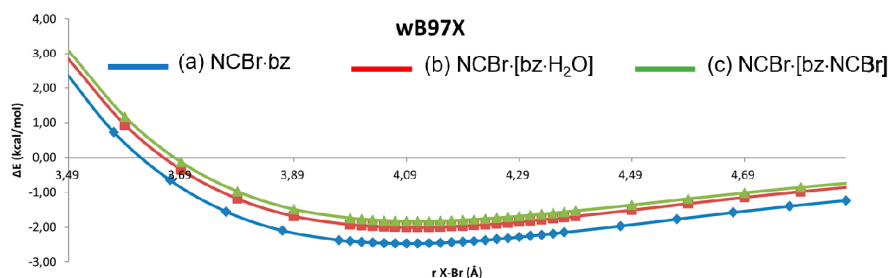

**Figure S12.** Binding energy curves,  $\Delta E$ , vs. Br distance from the center of benzene ring,  $r$ , computed for (a) NCBz-bz (blue line), (b) NCBz-[bz-H<sub>2</sub>O] (red line) and (c) NCBz-[bz-NCBr] (green line) systems in the perpendicular approach at the  $\omega$ B97X/aug-cc-PVTZ level of theory.

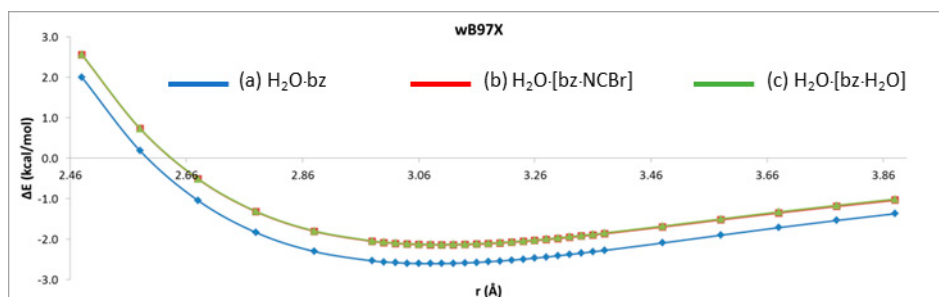

**Figure S13.** Binding energy curves,  $\Delta E$ , vs. (HO)H distance from the center of benzene ring,  $r$ , computed for (a) H<sub>2</sub>O-bz (blue line), (b) H<sub>2</sub>O-[bz-NCBr] (red line) and (c) H<sub>2</sub>O-[bz-H<sub>2</sub>O] (green line) systems in the perpendicular approach at the  $\omega$ B97X/aug-cc-PVTZ level of theory.

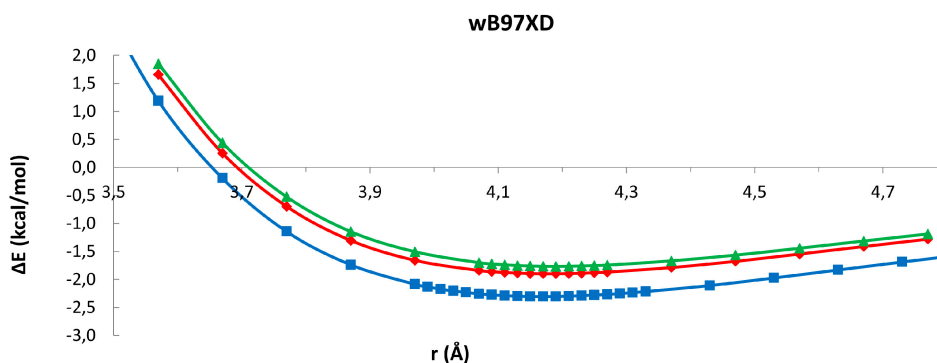

**Figure S14.** Binding energy curves,  $\Delta E$ , vs. Br distance from the center of benzene ring,  $r$ , computed for (a) NCBz·bz (blue line), (b) NCBz·[bz·H<sub>2</sub>O] (red line) and (c) NCBz·[bz·NCBz] (green line) systems in the perpendicular approach at the  $\omega B97XD/aug-cc-PVTZ$  level of theory.

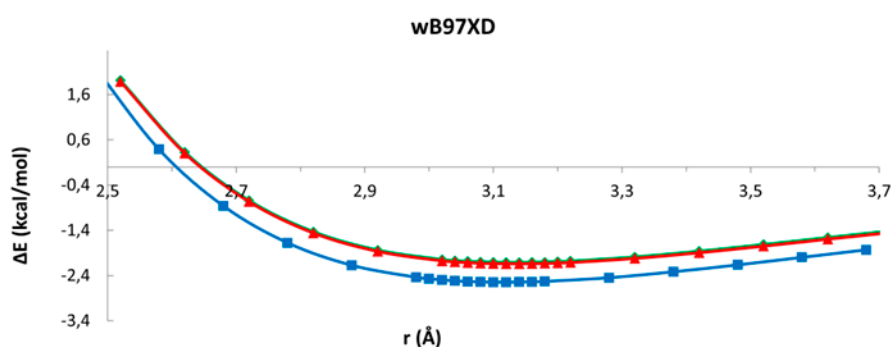

**Figure S15.** Binding energy curves,  $\Delta E$ , vs. (HO)H distance from the center of benzene ring,  $r$ , computed for (a) H<sub>2</sub>O·bz (blue line), (b) H<sub>2</sub>O·[bz·NCBz] (red line) and (c) H<sub>2</sub>O·[bz·H<sub>2</sub>O] (green line) systems in the perpendicular approach at the  $\omega B97XD/aug-cc-PVTZ$  level of theory.

**Table S10.** Binding energy,  $\Delta E$ , vs. Br distance from the center of benzene ring,  $r$ , computed for (a) NCBz·bz, (b) NCBz·[bz·H<sub>2</sub>O] and (c) NCBz·[bz·NCBz] systems in the perpendicular approach at the M06-2X/aug-cc-PVTZ level of theory.

| $r$ (Å) | $\Delta E$ (kcal/mol) | $r$ (Å) | $\Delta E$ (kcal/mol)                                |
|---------|-----------------------|---------|------------------------------------------------------|
|         | (a) NCBz·bz           |         | (b) NCBz·[bz·H <sub>2</sub> O]    (c) NCBz·[bz·NCBz] |
| 3.20    | 12.1989               | 3.34    | 6.5090    6.7773                                     |
| 3.30    | 7.4943                | 3.44    | 3.4488    3.6984                                     |
| 3.40    | 4.0218                | 3.54    | 1.2968    1.5331                                     |
| 3.50    | 1.5405                | 3.64    | -0.1514    0.0737                                    |
| 3.60    | -0.1571               | 3.74    | -1.0591    -0.8454                                   |
| 3.70    | -1.2542               | 3.84    | -1.5863    -1.3840                                   |
| 3.80    | -1.9043               | 3.86    | -1.6545    -1.4553                                   |
| 3.82    | -1.9952               | 3.88    | -1.7123    -1.5160                                   |
| 3.84    | -2.0744               | 3.90    | -1.7602    -1.5668                                   |
| 3.86    | -2.1419               | 3.92    | -1.7984    -1.6077                                   |
| 3.88    | -2.1981               | 3.94    | -1.8276    -1.6386                                   |
| 3.90    | -2.2438               | 3.96    | -1.8492    -1.6613                                   |
| 3.92    | -2.2797               | 3.98    | -1.8644    -1.6777                                   |
| 3.94    | -2.3065               | 4.00    | -1.8739    -1.6889                                   |
| 3.96    | -2.3251               | 4.02    | -1.8777    -1.6951                                   |

|      |         |      |         |         |
|------|---------|------|---------|---------|
| 3.98 | -2.3370 | 4.04 | -1.8765 | -1.6968 |
| 4.00 | -2.3433 | 4.06 | -1.8712 | -1.6946 |
| 4.02 | -2.3448 | 4.08 | -1.8626 | -1.6884 |
| 4.04 | -2.3420 | 4.10 | -1.8506 | -1.6778 |
| 4.06 | -2.3353 | 4.12 | -1.8352 | -1.6631 |
| 4.08 | -2.3252 | 4.14 | -1.8164 | -1.6449 |
| 4.10 | -2.3117 | 4.16 | -1.7943 | -1.6236 |
| 4.12 | -2.2947 | 4.18 | -1.7692 | -1.5993 |
| 4.14 | -2.2740 | 4.20 | -1.7409 | -1.5726 |
| 4.16 | -2.2498 | 4.22 | -1.7100 | -1.5439 |
| 4.18 | -2.2222 | 4.32 | -1.5371 | -1.3814 |
| 4.20 | -2.1913 | 4.42 | -1.3647 | -1.2169 |
| 4.30 | -2.0085 | 4.52 | -1.1965 | -1.0611 |
| 4.40 | -1.8268 | 4.62 | -1.0409 | -0.9078 |
| 4.50 | -1.6446 | 4.72 | -0.9088 | -0.7878 |
| 4.60 | -1.4752 |      |         |         |
| 4.70 | -1.3273 |      |         |         |
| 4.80 | -1.2007 |      |         |         |
| 4.90 | -1.0920 |      |         |         |
| 5.00 | -0.9980 |      |         |         |
| 5.10 | -0.9099 |      |         |         |

**Table S11.** Binding energy,  $\Delta E$ , vs. (HO)H distance from the center of benzene ring,  $r$ , computed for (a)  $\text{H}_2\text{O}\cdot\text{bz}$ , (b)  $\text{H}_2\text{O}\cdot[\text{bz}\cdot\text{NCBr}]$  and (c)  $\text{H}_2\text{O}\cdot[\text{bz}\cdot\text{H}_2\text{O}]$  systems in the perpendicular approach at the M06-2X/aug-cc-PVTZ level of theory.

| $r$ (Å) | $\Delta E$ (kcal/mol)                  | $r$ (Å) | $\Delta E$ (kcal/mol)                                    |                                                                 |
|---------|----------------------------------------|---------|----------------------------------------------------------|-----------------------------------------------------------------|
|         | (a) $\text{H}_2\text{O}\cdot\text{bz}$ |         | (b) $\text{H}_2\text{O}\cdot[\text{bz}\cdot\text{NCBr}]$ | (c) $\text{H}_2\text{O}\cdot[\text{bz}\cdot\text{H}_2\text{O}]$ |
| 1.80    | 48.6053                                | 2.38    | 5.0622                                                   | 5.0788                                                          |
| 2.00    | 25.4302                                | 2.48    | 2.5218                                                   | 2.5362                                                          |
| 2.20    | 11.6484                                | 2.58    | 0.7180                                                   | 0.7313                                                          |
| 2.40    | 3.9324                                 | 2.68    | -0.5104                                                  | -0.4973                                                         |
| 2.50    | 1.5608                                 | 2.78    | -1.2977                                                  | -1.2839                                                         |
| 2.60    | -0.1063                                | 2.88    | -1.7553                                                  | -1.8773                                                         |
| 2.70    | -1.2241                                | 2.90    | -1.8159                                                  | -1.9356                                                         |
| 2.80    | -1.9237                                | 2.92    | -1.8680                                                  | -1.9854                                                         |
| 2.90    | -2.3120                                | 2.94    | -1.9121                                                  | -2.0272                                                         |
| 2.92    | -2.3610                                | 2.96    | -1.9487                                                  | -2.0614                                                         |
| 2.94    | -2.4020                                | 2.98    | -1.9783                                                  | -2.0886                                                         |
| 2.96    | -2.4355                                | 3.00    | -2.0012                                                  | -2.1092                                                         |
| 2.98    | -2.4619                                | 3.02    | -2.0181                                                  | -2.1237                                                         |
| 3.00    | -2.4817                                | 3.04    | -2.0295                                                  | -2.1327                                                         |
| 3.02    | -2.4954                                | 3.06    | -2.0359                                                  | -2.1367                                                         |
| 3.04    | -2.5035                                | 3.08    | -2.0378                                                  | -2.1363                                                         |
| 3.06    | -2.5066                                | 3.10    | -2.0356                                                  | -2.1317                                                         |
| 3.08    | -2.5052                                | 3.12    | -2.0296                                                  | -2.1234                                                         |

|      |         |      |         |         |
|------|---------|------|---------|---------|
| 3.10 | -2.4996 | 3.14 | -2.0201 | -2.1116 |
| 3.12 | -2.4902 | 3.16 | -2.0074 | -2.0966 |
| 3.14 | -2.4773 | 3.18 | -1.9917 | -2.0787 |
| 3.16 | -2.4612 | 3.20 | -1.9733 | -2.0581 |
| 3.18 | -2.4421 | 3.22 | -1.9526 | -2.0351 |
| 3.20 | -2.4203 | 3.24 | -1.9298 | -2.0102 |
| 3.22 | -2.3961 | 3.26 | -1.9054 | -1.9836 |
| 3.24 | -2.3699 | 3.36 | -1.7640 | -1.7410 |
| 3.26 | -2.3420 | 3.46 | -1.6052 | -1.5797 |
| 3.28 | -2.3125 | 3.56 | -1.4459 | -1.4186 |
| 3.30 | -2.2816 | 3.66 | -1.2947 | -1.2653 |
| 3.40 | -2.1139 | 3.76 | -1.1591 | -1.1276 |
| 3.50 | -1.9363 |      |         |         |
| 3.60 | -1.7631 |      |         |         |
| 3.70 | -1.6010 |      |         |         |
| 3.80 | -1.4558 |      |         |         |
| 3.90 | -1.3233 |      |         |         |
| 4.00 | -1.2082 |      |         |         |
| 4.20 | -1.0086 |      |         |         |
| 4.40 | -0.8454 |      |         |         |
| 4.60 | -0.7037 |      |         |         |
| 4.80 | -0.5887 |      |         |         |
| 5.00 | -0.4868 |      |         |         |

**Table S12.** Binding energy,  $\Delta E$ , vs. Br distance from the center of benzene ring,  $r$ , computed for (a) NCB $\cdot$ bz, (b) NCB $\cdot$ [bz $\cdot$ H $_2$ O] and (c) NCB $\cdot$ [bz $\cdot$ NCBr] systems in the perpendicular approach at the M11/aug-cc-PVTZ level of theory.

| $r$ (Å) | $\Delta E$ (kcal/mol) | $r$ (Å) | $\Delta E$ (kcal/mol)                 |                                   |
|---------|-----------------------|---------|---------------------------------------|-----------------------------------|
|         | (a) NCB $\cdot$ bz    |         | (b) NCB $\cdot$ [bz $\cdot$ H $_2$ O] | (c) NCB $\cdot$ [bz $\cdot$ NCBr] |
| 3.38    | 5.5218                | 3.46    | 3.7942                                | 4.0425                            |
| 3.48    | 2.7394                | 3.56    | 1.7195                                | 1.9557                            |
| 3.58    | 0.8373                | 3.66    | 0.3498                                | 0.5755                            |
| 3.68    | -0.4006               | 3.76    | -0.5024                               | -0.2790                           |
| 3.78    | -1.1540               | 3.86    | -0.9880                               | -0.7736                           |
| 3.88    | -1.5670               | 3.96    | -1.2232                               | -1.0224                           |
| 3.90    | -1.6188               | 3.98    | -1.2486                               | -1.0510                           |
| 3.92    | -1.6623               | 4.00    | -1.2682                               | -1.0741                           |
| 3.94    | -1.6982               | 4.02    | -1.2826                               | -1.0920                           |
| 3.96    | -1.7271               | 4.04    | -1.2924                               | -1.1049                           |
| 3.98    | -1.7497               | 4.06    | -1.2980                               | -1.1131                           |
| 4.00    | -1.7665               | 4.08    | -1.2997                               | -1.1169                           |
| 4.02    | -1.7782               | 4.10    | -1.2981                               | -1.1169                           |
| 4.04    | -1.7853               | 4.12    | -1.2934                               | -1.1139                           |
| 4.06    | -1.7882               | 4.14    | -1.2860                               | -1.1084                           |

|      |         |      |         |         |
|------|---------|------|---------|---------|
| 4.08 | -1.7873 | 4.16 | -1.2761 | -1.1007 |
| 4.10 | -1.7829 | 4.18 | -1.2640 | -1.0910 |
| 4.12 | -1.7754 | 4.20 | -1.2499 | -1.0792 |
| 4.14 | -1.7651 | 4.22 | -1.2340 | -1.0654 |
| 4.16 | -1.7522 | 4.24 | -1.2165 | -1.0496 |
| 4.18 | -1.7370 | 4.26 | -1.1976 | -1.0321 |
| 4.20 | -1.7197 | 4.28 | -1.1775 | -1.0133 |
| 4.22 | -1.7007 | 4.30 | -1.1565 | -0.9936 |
| 4.24 | -1.6803 | 4.32 | -1.1348 | -0.9733 |
| 4.26 | -1.6587 | 4.34 | -1.1126 | -0.9527 |
| 4.38 | -1.5154 | 4.36 | -1.0901 | -0.9319 |
| 4.48 | -1.3829 | 4.46 | -0.9739 | -0.8267 |
| 4.58 | -1.2505 | 4.56 | -0.8500 | -0.7094 |
| 4.68 | -1.1297 | 4.66 | -0.7368 | -0.6060 |
| 4.78 | -1.0117 | 4.76 | -0.6358 | -0.5108 |
|      |         | 4.86 | -0.5343 | -0.4172 |

**Table S13.** Binding energy,  $\Delta E$ , vs. (HO)H distance from the center of benzene ring,  $r$ , computed for (a)  $\text{H}_2\text{O}\cdot\text{bz}$ , (b)  $\text{H}_2\text{O}\cdot[\text{bz}\cdot\text{NCBr}]$  and (c)  $\text{H}_2\text{O}\cdot[\text{bz}\cdot\text{H}_2\text{O}]$  systems in the perpendicular approach at the M11/aug-cc-PVTZ level of theory.

| $r$ (Å) | $\Delta E$ (kcal/mol)                  |                                                          |                                                                 |
|---------|----------------------------------------|----------------------------------------------------------|-----------------------------------------------------------------|
|         | (a) $\text{H}_2\text{O}\cdot\text{bz}$ | (b) $\text{H}_2\text{O}\cdot[\text{bz}\cdot\text{NCBr}]$ | (c) $\text{H}_2\text{O}\cdot[\text{bz}\cdot\text{H}_2\text{O}]$ |
| 2.40    | 4.7774                                 | 5.3742                                                   | 5.3754                                                          |
| 2.50    | 2.2983                                 | 2.8843                                                   | 2.8841                                                          |
| 2.60    | 0.5552                                 | 1.1278                                                   | 1.1277                                                          |
| 2.70    | -0.6147                                | -0.0580                                                  | -0.0565                                                         |
| 2.80    | -1.3489                                | -0.8093                                                  | -0.8057                                                         |
| 2.90    | -1.7630                                | -1.2408                                                  | -1.2356                                                         |
| 2.92    | -1.8161                                | -1.2974                                                  | -1.2919                                                         |
| 2.94    | -1.8610                                | -1.3458                                                  | -1.3400                                                         |
| 2.96    | -1.8981                                | -1.3865                                                  | -1.3805                                                         |
| 2.98    | -1.9283                                | -1.4203                                                  | -1.4140                                                         |
| 3.00    | -1.9519                                | -1.4476                                                  | -1.4409                                                         |
| 3.02    | -1.9697                                | -1.4690                                                  | -1.4620                                                         |
| 3.04    | -1.9820                                | -1.4850                                                  | -1.4776                                                         |
| 3.06    | -1.9893                                | -1.4961                                                  | -1.4882                                                         |
| 3.08    | -1.9921                                | -1.5028                                                  | -1.4944                                                         |
| 3.10    | -1.9909                                | -1.5055                                                  | -1.4965                                                         |
| 3.12    | -1.9861                                | -1.5045                                                  | -1.4949                                                         |
| 3.14    | -1.9779                                | -1.5004                                                  | -1.4900                                                         |
| 3.16    | -1.9669                                | -1.4933                                                  | -1.4822                                                         |
| 3.18    | -1.9532                                | -1.4836                                                  | -1.4718                                                         |
| 3.20    | -1.9373                                | -1.4717                                                  | -1.4592                                                         |
| 3.22    | -1.9193                                | -1.4577                                                  | -1.4445                                                         |

|      |         |         |         |
|------|---------|---------|---------|
| 3.24 | -1.8996 | -1.4420 | -1.4282 |
| 3.26 | -1.8784 | -1.4248 | -1.4103 |
| 3.28 | -1.8559 | -1.4063 | -1.3910 |
| 3.38 | -1.7295 | -1.2997 | -1.2810 |
| 3.48 | -1.5928 | -1.1818 | -1.1601 |
| 3.58 | -1.4579 | -1.0652 | -1.0409 |
| 3.68 | -1.3300 | -0.9548 | -0.9274 |
| 3.78 | -1.2099 | -0.8519 | -0.8221 |

**Table S14.** Binding energy,  $\Delta E$ , vs. Br distance from the center of benzene ring,  $r$ , computed for (a) NCB $\cdot$ bz, (b) NCB $\cdot$ [bz $\cdot$ H $_2$ O] and (c) NCB $\cdot$ [bz $\cdot$ NCBr] systems in the perpendicular approach at the  $\omega$ B97X/aug-cc-PVTZ level of theory.

| $r$ (Å)            | $\Delta E$ (kcal/mol) | $r$ (Å)                               | $\Delta E$ (kcal/mol)             |         |
|--------------------|-----------------------|---------------------------------------|-----------------------------------|---------|
| (a) NCB $\cdot$ bz |                       | (b) NCB $\cdot$ [bz $\cdot$ H $_2$ O] | (c) NCB $\cdot$ [bz $\cdot$ NCBr] |         |
| 3.47               | 2.7645                | 3.49                                  | 2.8320                            | 3.0767  |
| 3.57               | 0.7338                | 3.59                                  | 0.9359                            | 1.1677  |
| 3.67               | -0.6474               | 3.69                                  | -0.3520                           | -0.1344 |
| 3.77               | -1.5518               | 3.79                                  | -1.1845                           | -0.9762 |
| 3.87               | -2.0975               | 3.89                                  | -1.6838                           | -1.4875 |
| 3.97               | -2.3714               | 3.99                                  | -1.9271                           | -1.7389 |
| 3.99               | -2.4019               | 4.01                                  | -1.9535                           | -1.7678 |
| 4.01               | -2.4256               | 4.03                                  | -1.9730                           | -1.7897 |
| 4.03               | -2.4428               | 4.05                                  | -1.9876                           | -1.8070 |
| 4.05               | -2.4551               | 4.07                                  | -1.9977                           | -1.8194 |
| 4.07               | -2.4630               | 4.09                                  | -2.0028                           | -1.8271 |
| 4.09               | -2.4667               | 4.11                                  | -2.0036                           | -1.8296 |
| 4.11               | -2.4658               | 4.13                                  | -2.0000                           | -1.8271 |
| 4.13               | -2.4599               | 4.15                                  | -1.9924                           | -1.8205 |
| 4.15               | -2.4498               | 4.17                                  | -1.9809                           | -1.8099 |
| 4.17               | -2.4353               | 4.19                                  | -1.9651                           | -1.7955 |
| 4.19               | -2.4172               | 4.21                                  | -1.9462                           | -1.7776 |
| 4.21               | -2.3958               | 4.23                                  | -1.9240                           | -1.7567 |
| 4.23               | -2.3705               | 4.25                                  | -1.8990                           | -1.7346 |
| 4.25               | -2.3430               | 4.27                                  | -1.8722                           | -1.7101 |
| 4.27               | -2.3138               | 4.29                                  | -1.8431                           | -1.6837 |
| 4.29               | -2.2831               | 4.31                                  | -1.8134                           | -1.6555 |
| 4.31               | -2.2513               | 4.33                                  | -1.7830                           | -1.6262 |
| 4.33               | -2.2183               | 4.35                                  | -1.7515                           | -1.5959 |
| 4.35               | -2.1843               | 4.37                                  | -1.7195                           | -1.5649 |
| 4.37               | -2.1498               | 4.39                                  | -1.6863                           | -1.5332 |
| -1.97              | -1.9655               | 4.49                                  | -1.5089                           | -1.3654 |
| -1.77              | -1.7686               | 4.59                                  | -1.3229                           | -1.1852 |
| -1.58              | -1.5766               | 4.69                                  | -1.1445                           | -1.0147 |
| -1.40              | -1.3966               | 4.79                                  | -0.9782                           | -0.8552 |



|       |         |      |         |         |
|-------|---------|------|---------|---------|
| -1.23 | -1.2314 | 4.89 | -0.8264 | -0.7096 |
|-------|---------|------|---------|---------|

**Table S15.** Binding energy,  $\Delta E$ , vs. (HO)H distance from the center of benzene ring,  $r$ , computed for (a)  $\text{H}_2\text{O}\cdot\text{bz}$ , (b)  $\text{H}_2\text{O}\cdot[\text{bz}\cdot\text{NCBr}]$  and (c)  $\text{H}_2\text{O}\cdot[\text{bz}\cdot\text{H}_2\text{O}]$  systems in the perpendicular approach at the  $\omega\text{B97X}/\text{aug-cc-PVTZ}$  level of theory.

| $r$ (Å) | $\Delta E$ (kcal/mol)                  |                                                          |                                                                 |
|---------|----------------------------------------|----------------------------------------------------------|-----------------------------------------------------------------|
|         | (a) $\text{H}_2\text{O}\cdot\text{bz}$ | (b) $\text{H}_2\text{O}\cdot[\text{bz}\cdot\text{NCBr}]$ | (c) $\text{H}_2\text{O}\cdot[\text{bz}\cdot\text{H}_2\text{O}]$ |
| 2.48    | 2.0032                                 | 2.5586                                                   | 2.5679                                                          |
| 2.58    | 0.1876                                 | 0.7316                                                   | 0.7403                                                          |
| 2.68    | -1.0439                                | -0.5138                                                  | -0.5048                                                         |
| 2.78    | -1.8354                                | -1.3208                                                  | -1.3107                                                         |
| 2.88    | -2.3032                                | -1.8049                                                  | -1.7938                                                         |
| 2.98    | -2.5355                                | -2.0540                                                  | -2.0418                                                         |
| 3.00    | -2.5605                                | -2.0824                                                  | -2.0700                                                         |
| 3.02    | -2.5795                                | -2.1049                                                  | -2.0922                                                         |
| 3.04    | -2.5929                                | -2.1217                                                  | -2.1087                                                         |
| 3.06    | -2.6008                                | -2.1330                                                  | -2.1196                                                         |
| 3.08    | -2.6034                                | -2.1390                                                  | -2.1252                                                         |
| 3.10    | -2.6012                                | -2.1403                                                  | -2.1262                                                         |
| 3.12    | -2.5950                                | -2.1377                                                  | -2.1233                                                         |
| 3.14    | -2.5855                                | -2.1318                                                  | -2.1169                                                         |
| 3.16    | -2.5727                                | -2.1225                                                  | -2.1073                                                         |
| 3.18    | -2.5567                                | -2.1099                                                  | -2.0945                                                         |
| 3.20    | -2.5379                                | -2.0946                                                  | -2.0788                                                         |
| 3.22    | -2.5167                                | -2.0768                                                  | -2.0606                                                         |
| 3.24    | -2.4930                                | -2.0566                                                  | -2.0400                                                         |
| 3.26    | -2.4670                                | -2.0339                                                  | -2.0170                                                         |
| 3.28    | -2.4388                                | -2.0092                                                  | -1.9918                                                         |
| 3.30    | -2.4087                                | -1.9825                                                  | -1.9648                                                         |
| 3.32    | -2.3770                                | -1.9544                                                  | -1.9363                                                         |
| 3.34    | -2.3442                                | -1.9251                                                  | -1.9066                                                         |
| 3.36    | -2.3105                                | -1.8947                                                  | -1.8759                                                         |
| 3.38    | -2.2757                                | -1.8632                                                  | -1.8441                                                         |
| 3.48    | -2.0921                                | -1.6964                                                  | -1.6754                                                         |
| 3.58    | -1.9007                                | -1.5212                                                  | -1.4987                                                         |
| 3.68    | -1.7120                                | -1.3489                                                  | -1.3244                                                         |
| 3.78    | -1.5352                                | -1.1877                                                  | -1.1615                                                         |
| 3.88    | -1.3694                                | -1.0370                                                  | -1.0089                                                         |

**Table S16.** Binding energy,  $\Delta E$ , vs. Br distance from the center of benzene ring,  $r$ , computed for (a)  $\text{NCBr}\cdot\text{bz}$ , (b)  $\text{NCBr}\cdot[\text{bz}\cdot\text{H}_2\text{O}]$  and (c)  $\text{NCBr}\cdot[\text{bz}\cdot\text{NCBr}]$  systems in the perpendicular approach at the  $\omega\text{B97XD}/\text{aug-cc-PVTZ}$  level of theory.

| $r$ (Å) | $\Delta E$ (kcal/mol) | $r$ (Å) | $\Delta E$ (kcal/mol)                                    |                                                   |
|---------|-----------------------|---------|----------------------------------------------------------|---------------------------------------------------|
|         |                       |         | (b) $\text{NCBr}\cdot[\text{bz}\cdot\text{H}_2\text{O}]$ | (c) $\text{NCBr}\cdot[\text{bz}\cdot\text{NCBr}]$ |
| 3.47    | 3.1997                | 3.57    | 1.6572                                                   | 1.8516                                            |
| 3.57    | 1.1912                | 3.67    | 0.2548                                                   | 0.4382                                            |
| 3.67    | -0.1922               | 3.77    | -0.6947                                                  | -0.5241                                           |
| 3.77    | -1.1422               | 3.87    | -1.3026                                                  | -1.1454                                           |

|      |         |      |         |         |
|------|---------|------|---------|---------|
| 3.87 | -1.7358 | 3.97 | -1.6579 | -1.5044 |
| 3.97 | -2.0838 | 4.07 | -1.8401 | -1.7005 |
| 3.99 | -2.1310 | 4.09 | -1.8602 | -1.7222 |
| 4.01 | -2.1707 | 4.11 | -1.8755 | -1.7396 |
| 4.03 | -2.2032 | 4.13 | -1.8865 | -1.7518 |
| 4.05 | -2.2306 | 4.15 | -1.8941 | -1.7606 |
| 4.07 | -2.2540 | 4.17 | -1.8983 | -1.7664 |
| 4.09 | -2.2734 | 4.19 | -1.8981 | -1.7676 |
| 4.11 | -2.2881 | 4.21 | -1.8952 | -1.7651 |
| 4.13 | -2.2975 | 4.23 | -1.8889 | -1.7596 |
| 4.15 | -2.3029 | 4.25 | -1.8797 | -1.7521 |
| 4.17 | -2.3040 | 4.27 | -1.8681 | -1.7441 |
| 4.19 | -2.3022 | 4.37 | -1.7872 | -1.6682 |
| 4.21 | -2.2974 | 4.47 | -1.6763 | -1.5658 |
| 4.23 | -2.2886 | 4.57 | -1.5453 | -1.4428 |
| 4.25 | -2.2776 | 4.67 | -1.4117 | -1.3136 |
| 4.27 | -2.2648 | 4.77 | -1.2799 | -1.1885 |
| 4.29 | -2.2498 |      |         |         |
| 4.31 | -2.2328 |      |         |         |
| 4.33 | -2.2138 |      |         |         |
| 4.43 | -2.1069 |      |         |         |
| 4.53 | -1.9714 |      |         |         |
| 4.63 | -1.8292 |      |         |         |
| 4.73 | -1.6868 |      |         |         |
| 4.83 | -1.5498 |      |         |         |

**Table S17.** Binding energy,  $\Delta E$ , vs. (HO)H distance from the center of benzene ring,  $r$ , computed for (a)  $\text{H}_2\text{O}\cdot\text{bz}$ , (b)  $\text{H}_2\text{O}\cdot[\text{bz}\cdot\text{NCBr}]$  and (c)  $\text{H}_2\text{O}\cdot[\text{bz}\cdot\text{H}_2\text{O}]$  systems in the perpendicular approach at the  $\omega\text{B97XD/ aug-cc-PVTZ}$  level of theory.

| $r$ (Å) | $\Delta E$ (kcal/mol)                  | $r$ (Å) | $\Delta E$ (kcal/mol)                                    |                                                                 |
|---------|----------------------------------------|---------|----------------------------------------------------------|-----------------------------------------------------------------|
|         | (a) $\text{H}_2\text{O}\cdot\text{bz}$ |         | (b) $\text{H}_2\text{O}\cdot[\text{bz}\cdot\text{NCBr}]$ | (c) $\text{H}_2\text{O}\cdot[\text{bz}\cdot\text{H}_2\text{O}]$ |
| 2.48    | 2.2128                                 | 2.52    | 1.8852                                                   | 1.9131                                                          |
| 2.58    | 0.3886                                 | 2.62    | 0.2994                                                   | 0.3266                                                          |
| 2.68    | -0.8613                                | 2.72    | -0.7700                                                  | -0.7429                                                         |
| 2.78    | -1.6780                                | 2.82    | -1.4611                                                  | -1.4332                                                         |
| 2.88    | -2.1750                                | 2.92    | -1.8678                                                  | -1.8392                                                         |
| 2.98    | -2.4403                                | 3.02    | -2.0768                                                  | -2.0474                                                         |
| 3.00    | -2.4724                                | 3.04    | -2.1002                                                  | -2.0705                                                         |
| 3.02    | -2.4984                                | 3.06    | -2.1177                                                  | -2.0878                                                         |
| 3.04    | -2.5188                                | 3.08    | -2.1298                                                  | -2.0996                                                         |
| 3.06    | -2.5337                                | 3.10    | -2.1373                                                  | -2.1068                                                         |
| 3.08    | -2.5431                                | 3.12    | -2.1411                                                  | -2.1102                                                         |
| 3.10    | -2.5475                                | 3.14    | -2.1418                                                  | -2.1107                                                         |
| 3.12    | -2.5481                                | 3.16    | -2.1395                                                  | -2.1081                                                         |
| 3.14    | -2.5457                                | 3.18    | -2.1339                                                  | -2.1023                                                         |

|      |         |      |         |         |
|------|---------|------|---------|---------|
| 3.16 | -2.5404 | 3.20 | -2.1256 | -2.0937 |
| 3.18 | -2.5319 | 3.22 | -2.1147 | -2.0827 |
| 3.28 | -2.4497 | 3.32 | -2.0232 | -1.9897 |
| 3.38 | -2.3191 | 3.42 | -1.8975 | -1.8628 |
| 3.48 | -2.1660 | 3.52 | -1.7518 | -1.7155 |
| 3.58 | -1.9991 | 3.62 | -1.5977 | -1.5602 |
| 3.68 | -1.8323 | 3.72 | -1.4477 | -1.4088 |
